# Supplementary material for: Diagnosis and Management of Functional Tic-Like Phenomena
Source: MDPI journal article supplement (doi:10.3390/jcm11216470), 2022-10-31
Supplement: s1 [file s1]

# Supplementary Materials

**Table S1.** Data for features of functional *vs.* typical tics.

| Authors                | Year | Type of Feature | Feature                                                  | Evidence Type                                                                                          | Statistics for Feature of Interest                         | Comment                                                                                                                                                                                              |
|------------------------|------|-----------------|----------------------------------------------------------|--------------------------------------------------------------------------------------------------------|------------------------------------------------------------|------------------------------------------------------------------------------------------------------------------------------------------------------------------------------------------------------|
| Buts et al.            | 2022 | course          | abrupt onset                                             | 34 consecutive youth with sudden-onset tic-like movements                                              | 34/34                                                      | defining characteristic for group; [aa]                                                                                                                                                              |
| Dreissen et al.        | 2016 | course          | abrupt onset                                             | clinical experience, review                                                                            |                                                            |                                                                                                                                                                                                      |
| Ganos et al.           | 2014 | course          | abrupt onset                                             | case report                                                                                            |                                                            |                                                                                                                                                                                                      |
| Janik et al.           | 2014 | course          | abrupt onset                                             | 5 of 268 consecutive tic patients                                                                      | 5/5                                                        |                                                                                                                                                                                                      |
| Mink                   | 2013 | course          | abrupt onset                                             | 19 contemporary patients in the same small town                                                        | 19/19                                                      |                                                                                                                                                                                                      |
| Müller-Vahl et al.     | 2020 | course          | abrupt onset                                             | clinical experience                                                                                    |                                                            |                                                                                                                                                                                                      |
| Paulus et al.          | 2021 | course          | abrupt onset                                             | 13 patients with symptoms after watching "Tourette" videos on social media, and 13 matched TS controls | 12/12 (only in the FND sample) vs 0/13 with TS, $p < .001$ | Meaning that "the time from symptom onset to ... impair[ment] to such a degree that ... medical advice was required was short, typically less than a day." Probably lower accuracy in young children |
| Pringsheim and Martino | 2021 | course          | abrupt onset                                             | prospective cohort of adults with tic-like phenomenology, 9 rapid-onset, 24 TS / chronic tic disorder  | 100% onset over a period of hours to days                  |                                                                                                                                                                                                      |
| Pringsheim et al.      | 2021 | course          | abrupt onset                                             | clinical experience at 8 centers across the world                                                      |                                                            |                                                                                                                                                                                                      |
| Hull and Parnes        | 2021 | course          | abrupt onset, recalling exact onset date                 | 6 teenage girls seen in 3 months with abrupt-onset tic-like movements                                  | 5/6                                                        |                                                                                                                                                                                                      |
| Hull and Parnes        | 2021 | course          | anatomic distribution: hand tics at initial presentation | 6 teenage girls seen in 3 months with abrupt-onset tic-like movements                                  | 6/6                                                        |                                                                                                                                                                                                      |
| Ganos et al.           | 2014 | course          | complex behaviors at onset                               | case report                                                                                            |                                                            |                                                                                                                                                                                                      |
| Pringsheim et al.      | 2021 | course          | complex behaviors at onset                               | clinical experience at 8 centers across the world                                                      |                                                            |                                                                                                                                                                                                      |
| Paulus et al.          | 2021 | course          | complex movements at onset                               | 13 patients with symptoms after watching "Tourette" videos on social media, and 13 matched TS controls | 7/13 vs 0/13 TS controls, $p = .083$                       |                                                                                                                                                                                                      |
| Hull and Parnes        | 2021 | course          | complex vocalizations at onset                           | 6 teenage girls seen in 3 months with abrupt-onset tic-like movements                                  | 6/6                                                        |                                                                                                                                                                                                      |

|                                |      |              |                                                 |                                                                                                        |                                                                                                                                             |                                                                                                                                                                                                                                                                                                                                              |
|--------------------------------|------|--------------|-------------------------------------------------|--------------------------------------------------------------------------------------------------------|---------------------------------------------------------------------------------------------------------------------------------------------|----------------------------------------------------------------------------------------------------------------------------------------------------------------------------------------------------------------------------------------------------------------------------------------------------------------------------------------------|
| Müller-Vahl et al.             | 2020 | course       | does not peak around age 10-12                  | clinical experience                                                                                    |                                                                                                                                             |                                                                                                                                                                                                                                                                                                                                              |
| Hull and Parnes                | 2021 | course       | dystonic tics at initial presentation           | 6 teenage girls seen in 3 months with abrupt-onset tic-like movements                                  | 6/6                                                                                                                                         |                                                                                                                                                                                                                                                                                                                                              |
| Buts et al.                    | 2022 | course       | lack of spontaneous symptom fluctuations        | 34 consecutive youth with sudden-onset tic-like movements                                              | 23/34 (68%) had no waxing or waning                                                                                                         | [aa]                                                                                                                                                                                                                                                                                                                                         |
| Demartini et al.               | 2015 | course       | lack of spontaneous symptom fluctuations        | 11 FND patients                                                                                        |                                                                                                                                             |                                                                                                                                                                                                                                                                                                                                              |
| Dreissen et al.                | 2016 | course       | rapid deterioration to maximal symptom severity | clinical experience, review                                                                            |                                                                                                                                             |                                                                                                                                                                                                                                                                                                                                              |
| Monday and Jankovic            | 1993 | course       | spontaneous remissions lasting up to 10 hours   | 18 patients with "psychogenic myoclonus"                                                               |                                                                                                                                             | [gg]                                                                                                                                                                                                                                                                                                                                         |
| Pringsheim et al.              | 2021 | demographics | age at onset                                    | prospective cohort of children with tic-like phenomenology, 20 rapid-onset, 270 primary tic disorder   | mean 13.9 vs 6.4 years, p<.0001                                                                                                             |                                                                                                                                                                                                                                                                                                                                              |
| Han et al.                     | 2022 | demographics | age of onset                                    | consecutive child patients, 22 with functional tics, 163 with TS/CTD                                   | mean 13.8 vs 6.8 years, p<.0001                                                                                                             |                                                                                                                                                                                                                                                                                                                                              |
| Paulus et al.                  | 2021 | demographics | age of onset                                    | 13 patients with symptoms after watching "Tourette" videos on social media, and 13 matched TS controls | 15.31 ± 2.96 years vs 5.15 ± 2.79 years, p<.001                                                                                             |                                                                                                                                                                                                                                                                                                                                              |
| Anderson et al.                | 2022 | demographics | female                                          | prospective national sample of emergency department diagnoses in adults                                | During the pandemic, for "tic disorders, women ... (34.1%) and people aged 18 to 24 years ... (73.3%) had the greatest increases" in cases. | Adult NSSP publication by CDC examined ED notes for indications of a tic disorder including TS. Substantial increase "(25.8%) in tic disorder-related ED visit counts for women; and [high increase] in visit counts for ... tic disorders (25.8%) among adults aged 18 to 24 years after a COVID-19 case peak compared with during a peak." |
| Baizabal-Carvallo and Jankovic | 2014 | demographics | female                                          | 9 FND patients vs. 273 TS patients                                                                     | 55.6% vs. 21.5%, p=.03                                                                                                                      |                                                                                                                                                                                                                                                                                                                                              |
| Buts et al.                    | 2022 | demographics | female                                          | 34 consecutive youth with sudden-onset tic-like movements                                              | 32/34 (94%)                                                                                                                                 | [aa]                                                                                                                                                                                                                                                                                                                                         |
| Ganos et al.                   | 2019 | demographics | female                                          | clinical experience                                                                                    |                                                                                                                                             |                                                                                                                                                                                                                                                                                                                                              |

|                        |      |               |                       |                                                                                                       |                                                                                                                                                                                                                              |                                                                                                                                                                                          |
|------------------------|------|---------------|-----------------------|-------------------------------------------------------------------------------------------------------|------------------------------------------------------------------------------------------------------------------------------------------------------------------------------------------------------------------------------|------------------------------------------------------------------------------------------------------------------------------------------------------------------------------------------|
| Han et al.             | 2022 | de-mographics | female                | consecutive child patients, 22 with functional tics, 163 with TS/CTD                                  | 100% vs 28%,<br>p<.0001                                                                                                                                                                                                      |                                                                                                                                                                                          |
| Heintz et al           | 2013 | de-mographics | female                | 26 adults with FND resembling tics or myoclonus                                                       | 8/26, vs 3/16 in TS, p=.39                                                                                                                                                                                                   | sex <b>not</b> significantly different                                                                                                                                                   |
| Larsh et al.           | 2022 | de-mographics | female                | 89 new patients with FTD-tics vs 89 new patients with TS                                              | 83/89 vs 42/89,<br>p<.0001                                                                                                                                                                                                   | [bb]                                                                                                                                                                                     |
| McVige et al.          | 2012 | de-mographics | female                | teens in a small town                                                                                 | 13/14                                                                                                                                                                                                                        | [cc]                                                                                                                                                                                     |
| Mink                   | 2013 | de-mographics | female                | 19 contemporary patients in the same small town                                                       | 18/19                                                                                                                                                                                                                        |                                                                                                                                                                                          |
| Monday and Jankovic    | 1993 | de-mographics | female                | 18 patients with "psycho-genic myoclonus"                                                             | 13/18                                                                                                                                                                                                                        | [gg]                                                                                                                                                                                     |
| Olvera et al.          | 2021 | de-mographics | female                | TikTok videos labeled as tic or Tourette                                                              | 64.3% female, 17.6% male, and 14.3% identified as nonbinary                                                                                                                                                                  |                                                                                                                                                                                          |
| Pringsheim and Martino | 2021 | de-mographics | female                | prospective cohort of adults with tic-like phenomenology, 9 rapid-onset, 24 TS / chronic tic disorder | 100% vs 25%,<br>p<.0001                                                                                                                                                                                                      |                                                                                                                                                                                          |
| Pringsheim et al.      | 2021 | de-mographics | female                | clinical experience at 8 centers across the world                                                     |                                                                                                                                                                                                                              |                                                                                                                                                                                          |
| Pringsheim et al.      | 2021 | de-mographics | female                | prospective cohort of children with tic-like phenomenology, 20 rapid-onset, 270 primary tic disorder  | 95% vs 21%,<br>p<.0001                                                                                                                                                                                                       |                                                                                                                                                                                          |
| Radha-krishnan et al.  | 2022 | de-mographics | female                | prospective national sample of pediatric emergency department diagnoses                               | Dramatic spike in ER visits for tic disorders in 2021, almost all in girls "The proportion of ED visits ... among adolescent females ... for tic disorders approximately tripled during the pandemic." (See their figure 2B) | Child Nssp publication by CDC examined ED notes for indications of tic disorders including TS. Note that other psychiatric disorders also increased substantially in adolescent females. |
| Heintz et al           | 2013 | de-mographics | older at presentation | 26 adults with FND resembling tics or myoclonus                                                       | mean age 53.6 vs 33.4 years in TS, p<.001                                                                                                                                                                                    |                                                                                                                                                                                          |

|                                |      |                   |                                                   |                                                                                                       |                                                         |                                                 |
|--------------------------------|------|-------------------|---------------------------------------------------|-------------------------------------------------------------------------------------------------------|---------------------------------------------------------|-------------------------------------------------|
| Pringsheim and Martino         | 2021 | demographics      | older at presentation                             | prospective cohort of adults with tic-like phenomenology, 9 rapid-onset, 24 TS / chronic tic disorder | 15.3 vs 10.1 years, $p < .001$ ,                        |                                                 |
| Pringsheim et al.              | 2021 | demographics      | older at presentation                             | prospective cohort of children with tic-like phenomenology, 20 rapid-onset, 270 primary tic disorder  | mean 14.3 vs 10.5 years, $p < .0001$                    |                                                 |
| Müller-Vahl et al.             | 2020 | demographics      | onset after childhood (e.g. after age 8)          | clinical experience                                                                                   |                                                         |                                                 |
| Janik et al.                   | 2014 | demographics      | onset at age 17 or later                          | 5 of 268 consecutive tic patients                                                                     |                                                         | note: 3 of 5 also had typical tics in childhood |
| Buts et al.                    | 2022 | demographics      | onset in adolescence                              | 34 consecutive youth with sudden-onset tic-like movements                                             | mean onset at 13.7 years                                | [aa]                                            |
| Dreissen et al.                | 2016 | demographics      | onset in adolescence or adulthood                 | clinical experience, review                                                                           |                                                         |                                                 |
| Pringsheim et al.              | 2021 | demographics      | onset in adolescence or adulthood                 | clinical experience at 8 centers across the world                                                     |                                                         |                                                 |
| Baizabal-Carvallo and Jankovic | 2014 | demographics      | onset in adulthood                                | 9 FND patients vs. 273 TS patients                                                                    | mean age at presentation 36.3 vs 18.7 years, $p = .014$ |                                                 |
| Demartini et al.               | 2015 | demographics      | onset in adulthood                                | 11 FND patients                                                                                       |                                                         |                                                 |
| Ganos et al.                   | 2019 | demographics      | onset in adulthood                                | clinical experience                                                                                   |                                                         |                                                 |
| Heintz et al.                  | 2013 | demographics      | onset in adulthood                                | 26 adults with FND resembling tics or myoclonus                                                       | mean age 46.6 vs 15.8 years in TS, $p = .002$           |                                                 |
| Müller-Vahl et al.             | 2020 | demographics      | onset in adulthood                                | clinical experience                                                                                   |                                                         |                                                 |
| Pringsheim and Martino         | 2021 | demographics      | onset in adulthood                                | prospective cohort of adults with tic-like phenomenology, 9 rapid-onset, 24 TS / chronic tic disorder |                                                         |                                                 |
| Ganos et al.                   | 2014 | demographics      | onset in late adolescence                         | case report                                                                                           |                                                         |                                                 |
| Monday and Jankovic            | 1993 | initiating factor | (mostly minor) trauma 3 to 49 days prior to onset | 18 patients with "psychogenic myoclonus"                                                              | 6/14                                                    | [gg]                                            |

|                                |      |                   |                                                                |                                                                                                       |                         |                                                                                         |
|--------------------------------|------|-------------------|----------------------------------------------------------------|-------------------------------------------------------------------------------------------------------|-------------------------|-----------------------------------------------------------------------------------------|
| Mink                           | 2013 | initiating factor | exposure to similar symptoms, including by social media        | 19 contemporary patients in the same small town                                                       |                         |                                                                                         |
| Han et al.                     | 2022 | initiating factor | exposure to social media content involving tics                | consecutive child patients, 22 with functional tics, 163 with TS/CTD                                  | 18.2% vs (not reported) |                                                                                         |
| Pringsheim et al.              | 2021 | initiating factor | exposure to social media content involving tics                | prospective cohort of children with tic-like phenomenology, 20 rapid-onset, 270 primary tic disorder  | 20/20                   | exposure in TS/CTD group not reported                                                   |
| Buts et al.                    | 2022 | initiating factor | exposure to social media videos labeled as tics                | 34 consecutive youth with sudden-onset tic-like movements                                             |                         | [aa]                                                                                    |
| Pringsheim and Martino         | 2021 | initiating factor | exposure to social media with #Tics or #Tourettes              | prospective cohort of adults with tic-like phenomenology, 9 rapid-onset, 24 TS / chronic tic disorder | 9/9                     | exposure in TS/CTD group not formally assessed, but all had >10 years of typical TS/CTD |
| Hull and Parnes                | 2021 | initiating factor | exposure to the same social media tic videos                   | 6 teenage girls seen in 3 months with abrupt-onset tic-like movements                                 | 6/6                     |                                                                                         |
| McVige et al.                  | 2012 | initiating factor | history of prior tic disorder diagnosis                        | teens in a small town                                                                                 | 2/19                    | [cc]                                                                                    |
| Hull and Parnes                | 2021 | initiating factor | history of significant family trauma                           | 6 teenage girls seen in 3 months with abrupt-onset tic-like movements                                 | 4/6                     | possibly 5/6, text unclear                                                              |
| Baizabal-Carvallo and Jankovic | 2014 | initiating factor | history of tics in childhood                                   | 9 FND patients vs. 273 TS patients                                                                    | 0/9                     | family history not reported in the TS sample                                            |
| Pringsheim et al.              | 2021 | initiating factor | marked psychosocial stressors                                  | clinical experience at 8 centers across the world                                                     |                         |                                                                                         |
| Ganos et al.                   | 2019 | initiating factor | onset following trauma                                         | clinical experience                                                                                   |                         |                                                                                         |
| Müller-Vahl et al.             | 2020 | initiating factor | onset immediately after viewing the same symptoms              | clinical experience                                                                                   |                         | usually in videos on social media platforms                                             |
| Buts et al.                    | 2022 | initiating factor | other people in the environment with tics or tic-like symptoms | 34 consecutive youth with sudden-onset tic-like movements                                             | 19/34                   | [aa]                                                                                    |
| Mink                           | 2013 | initiating factor | pending litigation or compensation                             | clinical experience                                                                                   |                         |                                                                                         |

|                     |      |                    |                                                                                 |                                                                                                        |                                                                                                         |                                                                                     |
|---------------------|------|--------------------|---------------------------------------------------------------------------------|--------------------------------------------------------------------------------------------------------|---------------------------------------------------------------------------------------------------------|-------------------------------------------------------------------------------------|
| Dreissen et al.     | 2016 | initiating factor  | precipitating physical event or psychological stressor                          | clinical experience, review                                                                            |                                                                                                         |                                                                                     |
| Buts et al.         | 2022 | initiating factor  | previous diagnosis of tics                                                      | 34 consecutive youth with sudden-onset tic-like movements                                              | 15/34 (44%)                                                                                             | [aa]                                                                                |
| Kurlan et al.       | 1992 | initiating factor  | secondary gain                                                                  | case report                                                                                            |                                                                                                         | "Clear" secondary gain                                                              |
| Müller-Vahl et al.  | 2020 | initiating factor  | secondary gain                                                                  | expert opinion                                                                                         |                                                                                                         | "All our patients had a clear secondary gain" (Müller-Vahl, personal communication) |
| McVige et al.       | 2012 | initiating factor  | significant life stressors                                                      | teens in a small town                                                                                  | 10/14                                                                                                   | [cc]                                                                                |
| van der Salm et al. | 2012 | laboratory finding | absent Bereitschaftspotential before intentional wrist extension                | controlled case series                                                                                 | specificity 98% in their sample (1/14 Tourette, 17/29 psychogenic, 0/5 myoclonus, 0/25 healthy control) | authors note the finding needs replication                                          |
| van der Salm et al. | 2012 | laboratory finding | Bereitschaftspotential before tic-like phenomena                                | controlled case series                                                                                 |                                                                                                         | A BP may occur with tics, though with shorter onset latency (< 1 s)                 |
| Dooley et al.       | 1994 | modifying factor   | abnormal movements only on request or when patient knew she was being observed. | Two patients with TS who developed later phenomena felt to be functional                               | 1/2                                                                                                     |                                                                                     |
| Ganos et al.        | 2019 | modifying factor   | atypical response to anti-tic medication                                        | clinical experience                                                                                    |                                                                                                         |                                                                                     |
| Paulus et al.       | 2021 | modifying factor   | context dependent                                                               | 13 patients with symptoms after watching "Tourette" videos on social media, and 13 matched TS controls | 10/12 vs 0/13, p<.001                                                                                   |                                                                                     |
| Dreissen et al.     | 2016 | modifying factor   | decrease or disappear when not observed                                         | clinical experience, review                                                                            |                                                                                                         |                                                                                     |
| Pringsheim et al.   | 2021 | modifying factor   | disability but no impairment with preferred activities                          | clinical experience at 8 centers across the world                                                      |                                                                                                         |                                                                                     |
| Ganos et al.        | 2014 | modifying factor   | distraction may stop tics                                                       | case report                                                                                            |                                                                                                         | distraction minimized tics whereas intentional suppression did not affect tics      |

|                                |      |                  |                                                |                                                                                                        |                                                                                                            |                                                      |
|--------------------------------|------|------------------|------------------------------------------------|--------------------------------------------------------------------------------------------------------|------------------------------------------------------------------------------------------------------------|------------------------------------------------------|
| Janik et al.                   | 2014 | modifying factor | dramatic improvement in unexpected situations  | 5 of 268 consecutive tic patients                                                                      |                                                                                                            | when lying down or while smoking                     |
| Hull and Parnes                | 2021 | modifying factor | dramatic response to low-dose medication       | 6 teenage girls seen in 3 months with abrupt-onset tic-like movements                                  | 1/6                                                                                                        | all symptoms gone after 4 nights of guanfacine 0.5mg |
| Dreissen et al.                | 2016 | modifying factor | entrainment to externally supplied rhythm      | clinical experience, review                                                                            |                                                                                                            |                                                      |
| Kurlan et al.                  | 1992 | modifying factor | highly suggestible                             | case report                                                                                            |                                                                                                            |                                                      |
| Dreissen et al.                | 2016 | modifying factor | increase with attention                        | clinical experience, review                                                                            |                                                                                                            |                                                      |
| Paulus et al.                  | 2021 | modifying factor | increased symptoms around other people         | 13 patients with symptoms after watching "Tourette" videos on social media, and 13 matched TS controls | 12/12 vs 0/8, p<.001                                                                                       |                                                      |
| Dreissen et al.                | 2016 | modifying factor | less suppressible                              | clinical experience, review                                                                            |                                                                                                            |                                                      |
| Pringsheim et al.              | 2021 | modifying factor | less suppressible                              | clinical experience at 8 centers across the world                                                      |                                                                                                            |                                                      |
| Monday and Jankovic            | 1993 | modifying factor | marked reduction in amplitude with distraction | 18 patients with "psychogenic myoclonus"                                                               |                                                                                                            | [gg]                                                 |
| McVige et al.                  | 2012 | modifying factor | media attention                                | teens in a small town                                                                                  | "Notable exacerbation and prolongation of symptomatology was observed with increased media attention. ..." | [cc]                                                 |
| Baizabal-Carvallo and Jankovic | 2014 | modifying factor | not suppressible                               | 9 FND patients vs. 273 TS patients                                                                     | 8/9                                                                                                        |                                                      |
| Buts et al.                    | 2022 | modifying factor | not suppressible                               | 34 consecutive youth with sudden-onset tic-like movements                                              | 14/34 (41%)                                                                                                | [aa]                                                 |
| Demartini et al.               | 2015 | modifying factor | not suppressible                               | 11 FND patients                                                                                        | 9/11                                                                                                       |                                                      |
| Hull and Parnes                | 2021 | modifying factor | not suppressible                               | 6 teenage girls seen in 3 months with abrupt-onset tic-like movements                                  | 6/6                                                                                                        |                                                      |
| Janik et al.                   | 2014 | modifying factor | not suppressible                               | 5 of 268 consecutive tic patients                                                                      | 5/5                                                                                                        |                                                      |

|                                |      |                  |                                                             |                                                                                                        |                                                                                                         |      |
|--------------------------------|------|------------------|-------------------------------------------------------------|--------------------------------------------------------------------------------------------------------|---------------------------------------------------------------------------------------------------------|------|
| Mink                           | 2013 | modifying factor | not suppressible                                            | 19 contemporary patients in the same small town                                                        | 19/19                                                                                                   |      |
| Müller-Vahl et al.             | 2020 | modifying factor | not suppressible                                            | clinical experience                                                                                    |                                                                                                         |      |
| Paulus et al.                  | 2021 | modifying factor | not suppressible                                            | 13 patients with symptoms after watching "Tourette" videos on social media, and 13 matched TS controls | suppression in 5/12 vs 11/11, p=.082                                                                    |      |
| Robinson and Hedderly          | 2016 | modifying factor | not suppressible                                            | 12 children with TS and "tic attacks"                                                                  |                                                                                                         | [dd] |
| Paulus et al.                  | 2021 | modifying factor | not worse when alone                                        | 13 patients with symptoms after watching "Tourette" videos on social media, and 13 matched TS controls | worse when alone in 0/12 vs 8/8, p<.001                                                                 |      |
| McVige et al.                  | 2012 | modifying factor | psychosocial stressors                                      | teens in a small town                                                                                  | "Notable exacerbation and prolongation of symptomatology was observed with ... psychosocial stressors." | [cc] |
| Pringsheim and Martino         | 2021 | modifying factor | suggestible                                                 | prospective cohort of adults with tic-like phenomenology, 9 rapid-onset, 24 TS / chronic tic disorder  | 9/9                                                                                                     |      |
| Pringsheim and Martino         | 2021 | modifying factor | suppressible                                                | prospective cohort of adults with tic-like phenomenology, 9 rapid-onset, 24 TS / chronic tic disorder  | 6/9                                                                                                     |      |
| Paulus et al.                  | 2021 | modifying factor | symptoms continued during examination                       | 13 patients with symptoms after watching "Tourette" videos on social media, and 13 matched TS controls | 13/13 vs 1/10, p<.001                                                                                   |      |
| Paulus et al.                  | 2021 | modifying factor | symptoms worsened in the presence of others                 | 13 patients with symptoms after watching "Tourette" videos on social media, and 13 matched TS controls | 12/12 vs 0/8, p<.001                                                                                    |      |
| Monday and Jankovic            | 1993 | modifying factor | treatment: improvement with placebo                         | 18 patients with "psychogenic myoclonus"                                                               |                                                                                                         | [gg] |
| Baizabal-Carvallo and Jankovic | 2014 | modifying factor | treatment: lack of response to typical anti-tic medications | 9 FND patients vs. 273 TS patients                                                                     |                                                                                                         |      |

|                       |      |                        |                                                                                                                           |                                                                       |                                                                                                              |                                                            |
|-----------------------|------|------------------------|---------------------------------------------------------------------------------------------------------------------------|-----------------------------------------------------------------------|--------------------------------------------------------------------------------------------------------------|------------------------------------------------------------|
| Janik et al.          | 2014 | modifying factor       | treatment: lack of response to typical anti-tic medications                                                               | 5 of 268 consecutive tic patients                                     |                                                                                                              |                                                            |
| Dreissen et al.       | 2016 | modifying factor       | treatment: marked response to placebo                                                                                     | clinical experience, review                                           |                                                                                                              |                                                            |
| Monday and Jankovic   | 1993 | modifying factor       | treatment: marked response to placebo with suggestion                                                                     | 18 patients with "psychogenic myoclonus"                              |                                                                                                              | not tested comparably in Tourette syndrome; [gg]           |
| Kurlan et al.         | 1992 | modifying factor       | treatment: no response to dopamine antagonists at doses higher than those that well controlled the patient's typical tics | case report                                                           |                                                                                                              |                                                            |
| Dreissen et al.       | 2016 | modifying factor       | treatment: respond less well to behavior therapy                                                                          | clinical experience                                                   |                                                                                                              | authors note the limited evidence base                     |
| Kurlan et al.         | 1992 | modifying factor       | treatment: response to a brief course of psychotherapy                                                                    | case report                                                           |                                                                                                              |                                                            |
| Hull and Parnes       | 2021 | modifying factor       | unusual symptom triggers                                                                                                  | 6 teenage girls seen in 3 months with abrupt-onset tic-like movements | 5/6                                                                                                          | e.g. other people, lights, 7p.m. nightly, whistling sounds |
| Zea Vera et al.       | 2021 | modifying factor       | very strong influence by the environment                                                                                  | social media videos                                                   | over half                                                                                                    | [ff]                                                       |
| Monday and Jankovic   | 1993 | modifying factor       | worsened by stress, anxiety or exposure to noise or light                                                                 | 18 patients with "psychogenic myoclonus"                              | "Movements increased with 'stress' in 15, anxiety in 14, and exposure to noise in six and to light in four." | [gg]                                                       |
| Robinson and Hedderly | 2016 | other clinical feature | "increased focus on the tics in attempts to control the movements"                                                        | 12 children with TS and "tic attacks"                                 | 12/12                                                                                                        | [ee]                                                       |
| Dreissen et al.       | 2016 | other clinical feature | ADHD and OCD not common                                                                                                   | clinical experience, review                                           |                                                                                                              |                                                            |

|                                |      |                        |                                 |                                                                                                       |                                                                                  |                                                                   |
|--------------------------------|------|------------------------|---------------------------------|-------------------------------------------------------------------------------------------------------|----------------------------------------------------------------------------------|-------------------------------------------------------------------|
| Pringsheim and Martino         | 2021 | other clinical feature | ADHD diagnosis                  | prospective cohort of adults with tic-like phenomenology, 9 rapid-onset, 24 TS / chronic tic disorder | 22% vs 25%, NS                                                                   |                                                                   |
| Pringsheim et al.              | 2021 | other clinical feature | ADHD diagnosis                  | prospective cohort of children with tic-like phenomenology, 20 rapid-onset, 270 primary tic disorder  | 25% vs 44%, p=.09                                                                |                                                                   |
| Buts et al.                    | 2022 | other clinical feature | anxiety disorder                | 34 consecutive youth with sudden-onset tic-like movements                                             | 68%                                                                              | in 23, prior diagnosis reported by parents; diagnosis in 17; [aa] |
| Pringsheim et al.              | 2021 | other clinical feature | anxiety disorder                | prospective cohort of children with tic-like phenomenology, 20 rapid-onset, 270 primary tic disorder  | 75% vs 19%, p<.0001                                                              | still significant controlling for age and sex                     |
| Pringsheim et al.              | 2021 | other clinical feature | anxiety more severe             | prospective cohort of children with tic-like phenomenology, 20 rapid-onset, 270 primary tic disorder  | p<.0001                                                                          |                                                                   |
| Han et al.                     | 2022 | other clinical feature | anxiety or depression           | consecutive child patients, 22 with functional tics, 163 with TS/CTD                                  | 95% vs 41%, p<.0001                                                              |                                                                   |
| Buts et al.                    | 2022 | other clinical feature | autism spectrum disorder        | 34 consecutive youth with sudden-onset tic-like movements                                             | 12% reported, 57% suspected; 50% diagnosed clinically in a subset of 14 patients | [aa]                                                              |
| Kurlan et al.                  | 1992 | other clinical feature | borderline personality disorder | case report                                                                                           |                                                                                  |                                                                   |
| Baizabal-Carvallo and Jankovic | 2014 | other clinical feature | coexistence with other FNDs     | 9 FND patients vs. 273 TS patients                                                                    |                                                                                  |                                                                   |
| Demartini et al.               | 2015 | other clinical feature | coexistence with other FNDs     | 11 FND patients                                                                                       |                                                                                  |                                                                   |
| Ganos et al.                   | 2016 | other clinical feature | coexistence with other FNDs     | 13 patients with unusual vocalizations                                                                | 5/13 cases                                                                       |                                                                   |
| Ganos et al.                   | 2019 | other clinical feature | coexistence with other FNDs     | clinical experience                                                                                   |                                                                                  |                                                                   |
| Hull and Parnes                | 2021 | other clinical feature | coexistence with other FNDs     | 6 teenage girls seen in 3 months with abrupt-onset tic-like movements                                 | 4/6                                                                              |                                                                   |
| Janik et al.                   | 2014 | other clinical feature | coexistence with other FNDs     | 5 of 268 consecutive tic patients                                                                     | in 1/5 patients                                                                  |                                                                   |

|                        |      |                        |                                                                         |                                                                                                       |                                                                                                   |                                                                                  |
|------------------------|------|------------------------|-------------------------------------------------------------------------|-------------------------------------------------------------------------------------------------------|---------------------------------------------------------------------------------------------------|----------------------------------------------------------------------------------|
| Heintz et al.          | 2013 | other clinical feature | cognitive complaints without abnormal cognitive tests                   | 26 adults with FND resembling tics or myoclonus                                                       | Cognitive complaints in 50% with FND, vs 37.5% with TS and 9.1% in healthy control groups (p=.03) | TS group performed worse than FND or healthy groups on Stroop color test         |
| Buts et al.            | 2022 | other clinical feature | comorbid psychiatric disorders                                          | 34 consecutive youth with sudden-onset tic-like movements                                             | 91%                                                                                               | prior diagnosis reported by parents; includes neurodevelopmental disorders; [aa] |
| Larsh et al.           | 2022 | other clinical feature | current treatment by psychiatrist                                       | 89 new patients with FTD-tics vs 89 new patients with TS                                              | 36/89 vs 15/89, p=.002                                                                            | [bb]                                                                             |
| Larsh et al.           | 2022 | other clinical feature | current treatment by psychologist or therapist                          | 89 new patients with FTD-tics vs 89 new patients with TS                                              | 54/89 vs 29/89, p=.009                                                                            | [bb]                                                                             |
| Pringsheim and Martino | 2021 | other clinical feature | depression                                                              | prospective cohort of adults with tic-like phenomenology, 9 rapid-onset, 24 TS / chronic tic disorder | p=.03 for diagnosis of depression                                                                 |                                                                                  |
| Pringsheim et al.      | 2021 | other clinical feature | depression diagnosis                                                    | prospective cohort of children with tic-like phenomenology, 20 rapid-onset, 270 primary tic disorder  | p<.0001, 55% vs 4%                                                                                |                                                                                  |
| Pringsheim et al.      | 2021 | other clinical feature | depressive symptoms more severe                                         | prospective cohort of children with tic-like phenomenology, 20 rapid-onset, 270 primary tic disorder  | p<.0001                                                                                           |                                                                                  |
| Dreissen et al.        | 2016 | other clinical feature | exaggerated tendon reflexes or startle reactions                        | clinical experience, review                                                                           |                                                                                                   |                                                                                  |
| Monday and Jankovic    | 1993 | other clinical feature | functional sensory loss or weakness                                     | 18 patients with "psychogenic myoclonus"                                                              |                                                                                                   | [gg]                                                                             |
| Robinson and Hedderly  | 2016 | other clinical feature | marked anxiety prior to and during the attacks                          | 12 children with TS and "tic attacks"                                                                 | 12/12                                                                                             | [ee]                                                                             |
| McVige et al.          | 2012 | other clinical feature | migraines                                                               | teens in a small town                                                                                 | 9/14                                                                                              | [cc]                                                                             |
| Pringsheim and Martino | 2021 | other clinical feature | more psychiatric comorbidity                                            | prospective cohort of adults with tic-like phenomenology, 9 rapid-onset, 24 TS / chronic tic disorder | p<.05 for all self-report mental health symptom measures                                          |                                                                                  |
| McVige et al.          | 2012 | other clinical feature | neurological examination "findings consistent with conversion disorder" | teens in a small town                                                                                 |                                                                                                   | [cc]                                                                             |

|                                |      |                        |                                                               |                                                                                                       |                                                                                          |                                                                                                  |
|--------------------------------|------|------------------------|---------------------------------------------------------------|-------------------------------------------------------------------------------------------------------|------------------------------------------------------------------------------------------|--------------------------------------------------------------------------------------------------|
| Baizabal-Carvallo and Jankovic | 2014 | other clinical feature | no family history of tics                                     | 9 FND patients vs. 273 TS patients                                                                    | 9/9                                                                                      |                                                                                                  |
| Buts et al.                    | 2022 | other clinical feature | no family history of tics                                     | 34 consecutive youth with sudden-onset tic-like movements                                             | 27/34 (71%)                                                                              | [aa]                                                                                             |
| Demartini et al.               | 2015 | other clinical feature | no family history of tics                                     | 11 FND patients                                                                                       | 11/11                                                                                    |                                                                                                  |
| Dreissen et al.                | 2016 | other clinical feature | no family history of tics                                     | clinical experience, review                                                                           |                                                                                          |                                                                                                  |
| Ganos et al.                   | 2016 | other clinical feature | no family history of tics                                     | 13 patients with unusual vocalizations                                                                | 13/13                                                                                    |                                                                                                  |
| Hull and Parnes                | 2021 | other clinical feature | no family history of tics                                     | 6 teenage girls seen in 3 months with abrupt-onset tic-like movements                                 | 6/6                                                                                      |                                                                                                  |
| Heintz et al.                  | 2013 | other clinical feature | non-credible cognitive performance on a symptom validity test | 26 adults with FND resembling tics or myoclonus                                                       | scores about 1 SD below those of Tourette syndrome and healthy comparison groups (p=.01) |                                                                                                  |
| Ganos et al.                   | 2016 | other clinical feature | OCD                                                           | 13 patients with unusual vocalizations                                                                | 1/13                                                                                     |                                                                                                  |
| Pringsheim and Martino         | 2021 | other clinical feature | OCD diagnosis                                                 | prospective cohort of adults with tic-like phenomenology, 9 rapid-onset, 24 TS / chronic tic disorder | 0/9 (0%) vs 8/24 (33%), p=.07                                                            | but much higher scores on self-report O-C symptom severity measure, consistent with somatization |
| McVige et al.                  | 2012 | other clinical feature | other functional symptoms                                     | teens in a small town                                                                                 | 6/14 developed syncope and functional seizures                                           | [cc]                                                                                             |
| Dreissen et al.                | 2016 | other clinical feature | other functional symptoms, current or past                    | clinical experience, review                                                                           |                                                                                          |                                                                                                  |
| Heintz et al.                  | 2013 | other clinical feature | use of brain-active medication                                | 26 adults with FND resembling tics or myoclonus                                                       | 8/26, vs. 2/16 in TS, p=.013                                                             |                                                                                                  |
| Pringsheim and Martino         | 2021 | other clinical feature | worse quality of life score                                   | prospective cohort of adults with tic-like phenomenology, 9 rapid-onset, 24 TS / chronic tic disorder | mean 90.4 vs 60.1, p=.001                                                                |                                                                                                  |
| Demartini et al.               | 2015 | phenomenology          | "blocking tics"                                               | 11 FND patients                                                                                       |                                                                                          | interference with voluntary action is an item on the YGTSS                                       |
| Janik et al.                   | 2014 | phenomenology          | absence of simple motor tics of the face and neck             | 5 of 268 consecutive tic patients                                                                     |                                                                                          |                                                                                                  |

|                        |      |               |                                                                    |                                                                                                        |                                                                                                                                                                        |                                                                     |
|------------------------|------|---------------|--------------------------------------------------------------------|--------------------------------------------------------------------------------------------------------|------------------------------------------------------------------------------------------------------------------------------------------------------------------------|---------------------------------------------------------------------|
| Müller-Vahl et al.     | 2020 | phenomenology | absence of simple tics                                             | clinical experience                                                                                    |                                                                                                                                                                        |                                                                     |
| Zea Vera et al.        | 2021 | phenomenology | aggression                                                         | social media videos                                                                                    | 19.1%                                                                                                                                                                  | [ff]                                                                |
| Dreissen et al.        | 2016 | phenomenology | anatomic distribution: axial more often than head and neck         | clinical experience, review                                                                            |                                                                                                                                                                        |                                                                     |
| Monday and Jankovic    | 1993 | phenomenology | anatomic distribution: migrating                                   | 18 patients with "psychogenic myoclonus"                                                               |                                                                                                                                                                        | tics come and go over longer time intervals; [gg]                   |
| Ganos et al.           | 2019 | phenomenology | anatomic distribution: tics mainly involve arms or trunk           | clinical experience                                                                                    |                                                                                                                                                                        |                                                                     |
| Paulus et al.          | 2021 | phenomenology | anatomical distribution: predominantly involving trunk/extremities | 13 patients with symptoms after watching "Tourette" videos on social media, and 13 matched TS controls | 10/13 vs 0/11, p=.003                                                                                                                                                  |                                                                     |
| Janik et al.           | 2014 | phenomenology | atypical, non-tic-like behavior                                    | 5 of 268 consecutive tic patients                                                                      |                                                                                                                                                                        | attacks of deep breathing, parkinsonism, or mutism for several days |
| Zea Vera et al.        | 2021 | phenomenology | atypical, non-tic-like behavior                                    |                                                                                                        | Senior clinician impression median Likert ratings = 5 (interquartile range 4-5, where 1 = "All the tics are typical of TS" and 5= "None of the tics are typical of TS" |                                                                     |
| Han et al.             | 2022 | phenomenology | complex phrases                                                    | consecutive child patients, 22 with functional tics, 163 with TS/CTD                                   | 45% vs 0.6%, p<.0001                                                                                                                                                   |                                                                     |
| Pringsheim and Martino | 2021 | phenomenology | complex upper extremity tics                                       | prospective cohort of adults with tic-like phenomenology, 9 rapid-onset, 24 TS / chronic tic disorder  | 89% vs 13%, p<.0001                                                                                                                                                    |                                                                     |
| Pringsheim et al.      | 2021 | phenomenology | complex upper extremity tics                                       | clinical experience at 8 centers across the world                                                      |                                                                                                                                                                        |                                                                     |
| Paulus et al.          | 2021 | phenomenology | complex vocalizations                                              | 13 patients with symptoms after watching "Tourette" videos on social media, and 13 matched TS controls | 5/12 vs 2/13, p=NS                                                                                                                                                     |                                                                     |

|                        |      |               |                                                                 |                                                                                                        |                          |                                                                                                  |
|------------------------|------|---------------|-----------------------------------------------------------------|--------------------------------------------------------------------------------------------------------|--------------------------|--------------------------------------------------------------------------------------------------|
| Pringsheim and Martino | 2021 | phenomenology | complex vocalizations                                           | prospective cohort of adults with tic-like phenomenology, 9 rapid-onset, 24 TS / chronic tic disorder  | 89% vs 8%,<br>p<.0001    |                                                                                                  |
| Pringsheim et al.      | 2021 | phenomenology | complex vocalizations with a wide range of odd words or phrases | clinical experience at 8 centers across the world                                                      |                          |                                                                                                  |
| Zea Vera et al.        | 2021 | phenomenology | complex vocalizations with long phrases (>3 words)              | social media videos                                                                                    | 45.7%                    | [ff]                                                                                             |
| Paulus et al.          | 2021 | phenomenology | complex: predominantly complex                                  | 13 patients with symptoms after watching "Tourette" videos on social media, and 13 matched TS controls | 12/13 vs 0/13,<br>p<.001 |                                                                                                  |
| Han et al.             | 2022 | phenomenology | coprolalia                                                      | consecutive child patients, 22 with functional tics, 163 with TS/CTD                                   | 77% vs 10%,<br>p<.0001   |                                                                                                  |
| Hull and Parnes        | 2021 | phenomenology | coprolalia                                                      | 6 teenage girls seen in 3 months with abrupt-onset tic-like movements                                  | 2/6                      |                                                                                                  |
| Janik et al.           | 2014 | phenomenology | coprolalia                                                      | 5 of 268 consecutive tic patients                                                                      | 2/5                      |                                                                                                  |
| Olvera et al.          | 2021 | phenomenology | coprolalia                                                      | TikTok videos labeled as tic or Tourette                                                               | 50%                      | "93% had coprolalia or copropraxia versus 8% to 14% in the literature"                           |
| Pringsheim and Martino | 2021 | phenomenology | coprolalia                                                      | prospective cohort of adults with tic-like phenomenology, 9 rapid-onset, 24 TS / chronic tic disorder  | 67% vs 4%,<br>p=.0004    |                                                                                                  |
| Pringsheim et al.      | 2021 | phenomenology | coprolalia                                                      | clinical experience at 8 centers across the world                                                      |                          |                                                                                                  |
| Zea Vera et al.        | 2021 | phenomenology | coprolalia                                                      | social media videos                                                                                    | 53.2%                    | [ff]; coprophénomènes present in over half in social media videos, vs. ~10% in TS patient visits |
| Ganos et al.           | 2016 | phenomenology | coprolalia is atypical: longer, more complex                    | 13 patients with unusual vocalizations                                                                 |                          |                                                                                                  |
| Ganos et al.           | 2016 | phenomenology | coprolalia with atypically high number of different swear words | 13 patients with unusual vocalizations                                                                 |                          |                                                                                                  |
| Ganos et al.           | 2016 | phenomenology | coprophénomènes at onset                                        | 13 patients with unusual vocalizations                                                                 | 7/13                     |                                                                                                  |

|                         |      |               |                                                                                                        |                                                                                                        |                          |                                                                                                 |
|-------------------------|------|---------------|--------------------------------------------------------------------------------------------------------|--------------------------------------------------------------------------------------------------------|--------------------------|-------------------------------------------------------------------------------------------------|
| Buts et al.             | 2022 | phenomenology | coprophenomena or echophenomena                                                                        | 34 consecutive youth with sudden-onset tic-like movements                                              | 26/34 (77%)              | [aa]                                                                                            |
| Demartini et al.        | 2015 | phenomenology | coprophenomena or echophenomena                                                                        | 11 FND patients                                                                                        | 0/11                     | authors felt these phenomena were much less common in FND-tics                                  |
| Han et al.              | 2022 | phenomenology | copropraxia                                                                                            | consecutive child patients, 22 with functional tics, 163 with TS/CTD                                   | 45% vs 2%,<br>p<.0001    |                                                                                                 |
| Zea Vera et al.         | 2021 | phenomenology | copropraxia                                                                                            | social media videos                                                                                    | 20.2%                    | [ff]; coprophenomena present in over half in social media videos, vs. ~10% in TS patient visits |
| Paulus et al.           | 2021 | phenomenology | echolalia                                                                                              | 13 patients with symptoms after watching "Tourette" videos on social media, and 13 matched TS controls | 5/10 vs 0/13,<br>p=.112  |                                                                                                 |
| Paulus et al.           | 2021 | phenomenology | echopraxia                                                                                             | 13 patients with symptoms after watching "Tourette" videos on social media, and 13 matched TS controls | 5/9 vs 0/13,<br>p=.082   |                                                                                                 |
| Müller-Vahl et al.      | 2020 | phenomenology | exclusively complex and unusual movements or vocalizations                                             | clinical experience                                                                                    |                          |                                                                                                 |
| Dreissen et al.         | 2016 | phenomenology | feel completely involuntary to patient, rather than an almost inevitable response to a compelling urge | clinical experience, review                                                                            |                          |                                                                                                 |
| Monday and Jankovic     | 1993 | phenomenology | fluctuation between synchronous and asynchronous pattern                                               | 18 patients with "psychogenic myoclonus"                                                               |                          | [gg]                                                                                            |
| Paulus et al.           | 2021 | phenomenology | goal-directed movements, e.g. directed at others                                                       | 13 patients with symptoms after watching "Tourette" videos on social media, and 13 matched TS controls | 10/13 vs 0/13,<br>p=.002 |                                                                                                 |
| Müller-Vahl and Edwards | 2021 | phenomenology | incongruity between reported severity and function                                                     |                                                                                                        |                          |                                                                                                 |
| Ganos et al.            | 2014 | phenomenology | interference with voluntary action is common                                                           | case report                                                                                            |                          |                                                                                                 |

|                                |      |               |                                                   |                                                                                                        |                                                                  |                                                                   |
|--------------------------------|------|---------------|---------------------------------------------------|--------------------------------------------------------------------------------------------------------|------------------------------------------------------------------|-------------------------------------------------------------------|
| Ganos et al.                   | 2019 | phenomenology | interference with voluntary action is common      | clinical experience                                                                                    |                                                                  |                                                                   |
| Baizabal-Carvallo and Jankovic | 2014 | phenomenology | lack of premonitory phenomena                     | 9 FND patients vs. 273 TS patients                                                                     | 0/9 had premonitory phenomena                                    |                                                                   |
| Buts et al.                    | 2022 | phenomenology | lack of premonitory phenomena                     | 34 consecutive youth with sudden-onset tic-like movements                                              | 62% (21/34) had premonitory phenomena, vs 77% historical control | no qualitative data available to compare urge phenomenology; [aa] |
| Demartini et al.               | 2015 | phenomenology | lack of premonitory phenomena                     | 11 FND patients                                                                                        | 2/11 had premonitory phenomena                                   |                                                                   |
| Dreissen et al.                | 2016 | phenomenology | lack of premonitory phenomena                     | clinical experience, review                                                                            |                                                                  | urges have been described in functional phenomena                 |
| Hull and Parnes                | 2021 | phenomenology | lack of premonitory phenomena                     | 6 teenage girls seen in 3 months with abrupt-onset tic-like movements                                  | 4/6                                                              |                                                                   |
| Mink                           | 2013 | phenomenology | lack of premonitory phenomena                     | 19 contemporary patients in the same small town                                                        |                                                                  |                                                                   |
| Müller-Vahl et al.             | 2020 | phenomenology | lack of premonitory phenomena                     | clinical experience                                                                                    |                                                                  |                                                                   |
| Janik et al.                   | 2014 | phenomenology | lack of spontaneous symptom fluctuations          | 5 of 268 consecutive tic patients                                                                      |                                                                  |                                                                   |
| Müller-Vahl et al.             | 2020 | phenomenology | lack of spontaneous symptom fluctuations          | clinical experience                                                                                    |                                                                  |                                                                   |
| Paulus et al.                  | 2021 | phenomenology | lack of spontaneous symptom fluctuations          | 13 patients with symptoms after watching "Tourette" videos on social media, and 13 matched TS controls | fluctuations "over weeks/months" in 0/12 vs 13/13, p<.001        |                                                                   |
| Buts et al.                    | 2022 | phenomenology | lack of the typical rostrocaudal tic distribution | 34 consecutive youth with sudden-onset tic-like movements                                              | 62% started in the head or neck, vs 90% historical controls      | [aa]                                                              |
| Demartini et al.               | 2015 | phenomenology | lack of the typical rostrocaudal tic distribution | 11 FND patients                                                                                        | 2/11 lacked this distribution                                    |                                                                   |
| Ganos et al.                   | 2014 | phenomenology | lack of the typical rostrocaudal tic distribution | case report                                                                                            |                                                                  |                                                                   |
| Olvera et al.                  | 2021 | phenomenology | lack of the typical rostrocaudal tic distribution | TikTok videos labeled as tic or Tourette                                                               | 85.70%                                                           | arm movements more common than facial tics                        |

|                        |      |               |                                                                |                                                                                                        |                                                                                                     |                                                 |
|------------------------|------|---------------|----------------------------------------------------------------|--------------------------------------------------------------------------------------------------------|-----------------------------------------------------------------------------------------------------|-------------------------------------------------|
| Pringsheim et al.      | 2021 | phenomenology | lack of the typical rostrocaudal tic distribution              | clinical experience at 8 centers across the world                                                      |                                                                                                     |                                                 |
| Dreissen et al.        | 2016 | phenomenology | less stereotyped and more variable than tics                   | clinical experience, review                                                                            |                                                                                                     |                                                 |
| Buts et al.            | 2022 | phenomenology | more impaired global functioning                               | 34 consecutive youth with sudden-onset tic-like movements                                              | More impaired CGAS, median 45 (range 35-75), vs. historical control of 59 $\pm$ 7.9 (mean $\pm$ SD) | CGAS = Children's Global Assessment Scale; [aa] |
| Ganos et al.           | 2014 | phenomenology | most symptoms were not stereotyped                             | case report                                                                                            |                                                                                                     |                                                 |
| Paulus et al.          | 2021 | phenomenology | mostly slow and tonic movements                                | 13 patients with symptoms after watching "Tourette" videos on social media, and 13 matched TS controls | 12/13 vs 0/13, $p < .001$                                                                           |                                                 |
| Larsh et al.           | 2022 | phenomenology | movements cause pain                                           | 89 new patients with FTD-tics vs 89 new patients with TS                                               | 63/89 vs 48/89, $p = .25$                                                                           | [bb]                                            |
| Mink                   | 2013 | phenomenology | not stereotyped                                                | 19 contemporary patients in the same small town                                                        |                                                                                                     |                                                 |
| Dreissen et al.        | 2016 | phenomenology | patient less likely to attempt to hide or camouflage movements | clinical experience, review                                                                            |                                                                                                     |                                                 |
| Paulus et al.          | 2021 | phenomenology | premonitory sensations                                         | 13 patients with symptoms after watching "Tourette" videos on social media, and 13 matched TS controls | 10/12 vs 12/13, $p = \text{NS}$                                                                     |                                                 |
| Pringsheim and Martino | 2021 | phenomenology | premonitory urges                                              | prospective cohort of adults with tic-like phenomenology, 9 rapid-onset, 24 TS / chronic tic disorder  | 9/9                                                                                                 |                                                 |
| Kurlan et al.          | 1992 | phenomenology | resembled a functional seizure                                 | case report                                                                                            |                                                                                                     |                                                 |
| Dreissen et al.        | 2016 | phenomenology | rhythmic                                                       | clinical experience, review                                                                            |                                                                                                     |                                                 |
| Pringsheim and Martino | 2021 | phenomenology | same symptoms as on social media                               | prospective cohort of adults with tic-like phenomenology, 9 rapid-onset, 24 TS / chronic tic disorder  | "several"                                                                                           |                                                 |

|                         |      |               |                                                               |                                                                        |                                                                                             |                                                                                                                                                          |
|-------------------------|------|---------------|---------------------------------------------------------------|------------------------------------------------------------------------|---------------------------------------------------------------------------------------------|----------------------------------------------------------------------------------------------------------------------------------------------------------|
| Müller-Vahl and Edwards | 2021 | phenomenology | selective effect of abnormal movements on intentional actions |                                                                        |                                                                                             | "unwanted obligations can no longer be performed, while favorite activities can be conducted without any restrictions"                                   |
| Hull and Parnes         | 2021 | phenomenology | self-injurious behavior                                       | 6 teenage girls seen in 3 months with abrupt-onset tic-like movements  | 2/6                                                                                         |                                                                                                                                                          |
| Olvera et al.           | 2021 | phenomenology | self-injurious behavior                                       | TikTok videos labeled as tic or Tourette                               | 85.7%, vs 14% in literature                                                                 | "generally caused significant injury, with many users showing bruises or abrasions and themselves crying as a result of these injuries"                  |
| Zea Vera et al.         | 2021 | phenomenology | self-injurious behaviors                                      | social media videos                                                    | 27.7%                                                                                       | [ff]                                                                                                                                                     |
| Han et al.              | 2022 | phenomenology | self-injurious tic-like behaviors                             | consecutive child patients, 22 with functional tics, 163 with TS/CTD   | 50% vs 4%, p<.0001                                                                          |                                                                                                                                                          |
| Pringsheim et al.       | 2021 | phenomenology | self-injurious tic-like behaviors                             | clinical experience at 8 centers across the world                      |                                                                                             |                                                                                                                                                          |
| Dreissen et al.         | 2016 | phenomenology | striking disruption of voluntary movement                     | clinical experience, review                                            |                                                                                             |                                                                                                                                                          |
| Olvera et al.           | 2021 | phenomenology | striking disruption of voluntary movement                     | TikTok videos labeled as tic or Tourette                               | "89.3% had movements that were disruptive to activity versus 12% to 29% in the literature." |                                                                                                                                                          |
| Buts et al.             | 2022 | phenomenology | symptoms "almost identical" to those in social media videos   | 34 consecutive youth with sudden-onset tic-like movements              | 14/34 (41%)                                                                                 | [aa]                                                                                                                                                     |
| Dooley et al.           | 1994 | phenomenology | symptoms were not stereotyped                                 | 2 patients with TS who developed later phenomena felt to be functional |                                                                                             | movements were not stereotyped from one instance to the next                                                                                             |
| Zea Vera et al.         | 2021 | phenomenology | throwing objects                                              | social media videos                                                    | 22.3%                                                                                       | [ff]                                                                                                                                                     |
| Ganos et al.            | 2019 | phenomenology | typically very aware of their tics                            | clinical experience                                                    |                                                                                             | many people with TS or tics in autism are aware of none or only some of their tics                                                                       |
| Janik et al.            | 2014 | phenomenology | unchanging clinical pattern                                   | 5 of 268 consecutive tic patients                                      | 2/5                                                                                         |                                                                                                                                                          |
| Ganos et al.            | 2016 | phenomenology | unusual premonitory sensory phenomena                         | 13 patients with unusual vocalizations                                 | 9/13                                                                                        | 9 of 13 had premonitory sensations, summarized in text as being atypical, with examples of "a sudden energy pulse" and "generalized whole body pressure" |

|                       |      |               |                                                                    |                                                                                                        |                                                         |                                                                                |
|-----------------------|------|---------------|--------------------------------------------------------------------|--------------------------------------------------------------------------------------------------------|---------------------------------------------------------|--------------------------------------------------------------------------------|
| Ganos et al.          | 2019 | phenomenology | unusual symptoms like pain or nausea can accompany tic suppression | clinical experience                                                                                    |                                                         |                                                                                |
| Monday and Jankovic   | 1993 | phenomenology | variable amplitude and frequency                                   | 18 patients with "psychogenic myoclonus"                                                               |                                                         | [gg]                                                                           |
| Paulus et al.         | 2021 | phenomenology | varied repertoire                                                  | 13 patients with symptoms after watching "Tourette" videos on social media, and 13 matched TS controls | 13/13 vs 0/13, p<.001                                   |                                                                                |
| Ganos et al.          | 2014 | phenomenology | very complex actions                                               | case report                                                                                            |                                                         |                                                                                |
| Kurlan et al.         | 1992 | phenomenology | very different from patient's past tics                            | case report                                                                                            |                                                         |                                                                                |
| Kurlan et al.         | 1992 | phenomenology | very different from typical Tourette phenomenology                 | case report                                                                                            |                                                         |                                                                                |
| Olvera et al.         | 2021 | phenomenology | very frequent tics                                                 | TikTok videos labeled as tic or Tourette                                                               | Average 29 tics per minute                              |                                                                                |
| Janik et al.          | 2014 | phenomenology | vocalizations and complex motor activities                         | 5 of 268 consecutive tic patients                                                                      | vocalizations (4/5), complex non-tic movements (4 of 5) |                                                                                |
| Olvera et al.         | 2021 | severity      | disabling                                                          | TikTok videos labeled as tic or Tourette                                                               |                                                         | "Almost all recorded TikTok tics were severe, causing significant disability." |
| Robinson and Hedderly | 2016 | severity      | disabling                                                          | 12 children with TS and "tic attacks"                                                                  |                                                         | [dd]                                                                           |
| Han et al.            | 2022 | severity      | disabling (missing school)                                         | consecutive child patients, 22 with functional tics, 163 with TS/CTD                                   | 56% vs 7%, p<.0001                                      |                                                                                |
| Larsh et al.          | 2022 | severity      | emergency department visit                                         | 89 new patients with FTD-tics vs 89 new patients with TS                                               | 27/89 (30.3%) vs 10/89 (11.2%), p=.048                  | [bb]                                                                           |
| Buts et al.           | 2022 | severity      | high severity                                                      | 34 consecutive youth with sudden-onset tic-like movements                                              | YGTSS 62.6 ± 19 (mean ± SD), vs historical control 25   | [aa]                                                                           |
| Janik et al.          | 2014 | severity      | high severity                                                      | 5 of 268 consecutive tic patients                                                                      | 5/5                                                     |                                                                                |
| Larsh et al.          | 2022 | severity      | home schooled because of movements                                 | 89 new patients with FTD-tics vs 89 new patients with TS                                               | 12/89 vs 2/89, p=.027                                   | [bb]                                                                           |
| Olvera et al.         | 2021 | severity      | hospital visit due to movements                                    | TikTok videos labeled as tic or Tourette                                                               | 39.3%                                                   |                                                                                |

|                        |      |          |                                                                  |                                                                                                       |                                                                                    |                                                                    |
|------------------------|------|----------|------------------------------------------------------------------|-------------------------------------------------------------------------------------------------------|------------------------------------------------------------------------------------|--------------------------------------------------------------------|
| Han et al.             | 2022 | severity | hospitalization or emergency department visits                   | consecutive child patients, 22 with functional tics, 163 with TS/CTD                                  | 36% vs 2%,<br>p<.0001                                                              |                                                                    |
| Larsh et al.           | 2022 | severity | impairment rated by child                                        | children age ≥10 from among 89 new patients with FTD-tics and 89 new patients with TS                 | mean scores from mini-CTIM-C 9.9 tic-related, 11.1 other, vs 8.6, 11.2; p=.15, .49 | [bb]; mini-CTIM-C = mini-child TS impairment scale, child version  |
| Larsh et al.           | 2022 | severity | impairment rated by parent                                       | 89 new patients with FTD-tics vs 89 new patients with TS                                              | mean scores from mini-CTIM-P 10.0 tic-related, 10.3 other, vs 8.6, 9.2; p=.14, .37 | [bb]; mini-CTIM-P = mini-child TS impairment scale, parent version |
| Janik et al.           | 2014 | severity | maximal severity at onset                                        | 5 of 268 consecutive tic patients                                                                     |                                                                                    |                                                                    |
| Pringsheim and Martino | 2021 | severity | more severe symptoms                                             | prospective cohort of adults with tic-like phenomenology, 9 rapid-onset, 24 TS / chronic tic disorder | p<.01 for YGTSS motor and vocal tic and impairment scores                          |                                                                    |
| Larsh et al.           | 2022 | severity | movements injure the body                                        | 89 new patients with FTD-tics vs 89 new patients with TS                                              | 42/89 vs 10/89, p<.001                                                             | [bb]                                                               |
| Olvera et al.          | 2021 | severity | prolonged bouts of severe tics                                   | TikTok videos labeled as tic or Tourette                                                              | 64.3%                                                                              | severe movements lasting for minutes to hours                      |
| Hull and Parnes        | 2021 | severity | prolonged bouts of unceasing tics                                | 6 teenage girls seen in 3 months with abrupt-onset tic-like movements                                 | 6/6                                                                                |                                                                    |
| Robinson and Hedderly  | 2016 | severity | prolonged bouts of unceasing tics (15 minutes to hours)          | 12 children with TS and "tic attacks"                                                                 |                                                                                    | [dd]                                                               |
| Olvera et al.          | 2021 | severity | severe                                                           | TikTok videos labeled as tic or Tourette                                                              |                                                                                    | "almost all recorded TikTok tics were severe"                      |
| Pringsheim et al.      | 2021 | severity | severe                                                           | prospective cohort of children with tic-like phenomenology, 20 rapid-onset, 270 primary tic disorder  | p≤.0001 YGTSS total tic score mean 33.3 vs 18.4, impairment mean 28.6 vs 15.8      | greater YGTSS score when controlling for age and sex, p<.0001      |
| Robinson and Hedderly  | 2016 | severity | severe                                                           | 12 children with TS and "tic attacks"                                                                 |                                                                                    | [dd]                                                               |
| Buts et al.            | 2022 | severity | severe at onset: initial presentation to an emergency department | 34 consecutive youth with sudden-onset tic-like movements                                             | 16/34 (47%)                                                                        | 44% received medication in the emergency department; [aa]          |

|                      |      |               |                                                                       |                                                      |
|----------------------|------|---------------|-----------------------------------------------------------------------|------------------------------------------------------|
| Pringsheim<br>et al. | 2021 | sever-<br>ity | very severe at<br>onset, often<br>presenting for<br>emergency<br>care | clinical experience at 8<br>centers across the world |
|----------------------|------|---------------|-----------------------------------------------------------------------|------------------------------------------------------|

---

Table 1 notes.  
[aa] Overlap with Pringsheim et al 2021 prospective child registry  
[bb] All diagnosed clinically at a single referral center in 2021; TS sample enriched to match sample for age  
[cc] Overlaps with group reported by Mink, 2013  
[dd] Sample defined by this feature (among others), but interpreted as having FND contribute to symptom maintenance  
[ee] Sample selected for prolonged, severe, nonsuppressible bouts but interpreted as having FND contribute to symptom maintenance  
[ff] Not directly compared to a TS sample  
[gg] May include some tic-like movements: the case definition included "movements that were best categorized as myoclonic because they were sudden and brief," with at least one patient showing rebound of kicking movements after suppression.
